# Supplementary material for: CmWRKY1 Enhances the Dehydration Tolerance of Chrysanthemum through the Regulation of ABA-Associated Genes
Source: PubMed Central journal article supplement (PMC4777562; doi:10.1371/journal.pone.0150572), 2016-03-03
Supplement: pone.0150572.s001.pdf [file pone.0150572.s001.pdf]

**Table 1** Primer names and sequences used in this study.

| Prime name         | Sequence (5' to 3')                         |
|--------------------|---------------------------------------------|
| CmHyg-F            | CTTCTACACAGCCATCGGTCCAG                     |
| CmHyg-R            | CGGAAGTGCTTGACATTGGGGAG                     |
| Oligo (dT)         | AAGCAGTGGTATCAACGCAGAGTACTTTTTTTTTTTTTTTTTT |
| dT-R               | AAGCAGTGGTATCAACGCAGAGTAC                   |
| CmEF1 $\alpha$ -F  | TTTTGGTATCTGGTCCTGGAG                       |
| CmEF1 $\alpha$ -R  | CCATTCAAGCGACAGACTCA                        |
| CmABI4-F           | GATCGTGGCTGAGAGACTCG                        |
| CmABI4-R           | TACCCACGTTCTTTGCCTC                         |
| CmABI5-F           | CAGCAGCAGCAACAACCTGTT                       |
| CmABI5-R           | CTACAGGACTACCCAACGGC                        |
| CmDREB1A-F         | CGGTTTTGGCTATGAGGGGT                        |
| CmDREB1A-R         | TTCTTCTGCCAGCGTCACAT                        |
| CmMYB2-F           | GGCCATGGACACTTGAGGAA                        |
| CmMYB2-R           | ATTCCAACGGCCTTACCAT                         |
| CmRAB18-F          | TGTAGTGCAAAAACCCGGGT                        |
| CmRAB18-R          | GTTGACCCCTCAGCAGTCAA                        |
| CmABI1-F           | ATGGGCATCGTGTTTTGGC                         |
| CmABI1-R           | TAACCCGTCACTGGCTAGGA                        |
| CmPYL2-F           | TCAATCCCACAAGGCCTCAC                        |
| CmPYL2-R           | ACGAGGGATGTGCATGTGTT                        |
| CmABI2-F           | GAAGAGCCCGGGTCTGAAAA                        |
| CmABI2-R           | CGCCAATGCCAACTTTGTCA                        |
| CmSnRK2.2-F        | ATTGTTGGATGGGAGCCCTG                        |
| CmSnRK2.2-R        | GCTGGTGTACCAACTGTCTGA                       |
| CmPP2C-F           | TAGTGATGGACTTTGGGATGTGG                     |
| CmPP2C-R           | GCCAATGCCAACTTTGTCAGTAA                     |
| CmNCED3A-RT-F      | AGTATGGTGGTGAGCCGTTGTATCTAC                 |
| CmNCED3A-RT-R      | GCATTCACAATCTGGAGTTCGGACTTC                 |
| CmWRKY1-GATE-SAL-F | CGCGTCGACATGGGCAAAGATGGA                    |
| CmWRKY1-GATE-NOT-R | TTTGCGGCCGGAATTCCTTGAAAT                    |
| CmWRKY1-DL-F       | CCACGTTTGAATCTTCGGT                         |
| CmWRKY1-DL-R       | TCGCGATGTGAGTTCTTGTC                        |
